# Supplementary material
Source: HighWire-hosted journal article supplement (http://gut.bmjjournals.com/highwire/filestream/192649/field_highwire_adjunct_files/0/LGG_Supp_Fig_1_v1_0_20110831_9.pdf)

# Supplementary FIGURE 1

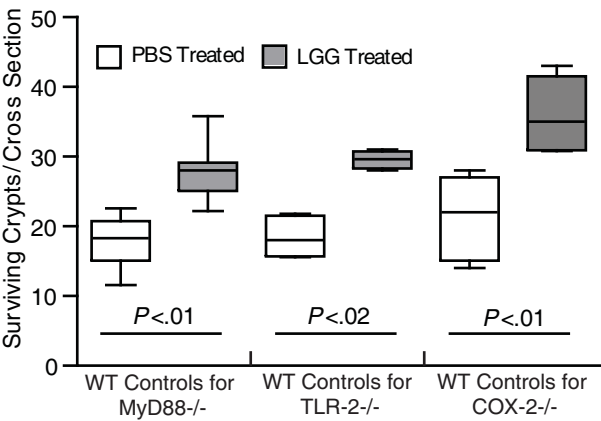

Supplement: LGG_Supp_Fig_1_v1_0_20110831_9.pdf [file LGG_Supp_Fig_1_v1_0_20110831_9.pdf]
